# Supplementary material for: Non-Penetrance for Ocular Phenotype in Two Individuals Carrying Heterozygous Loss-of-Function ZEB1 Alleles
Source: MDPI journal article supplement (doi:10.3390/genes12050677), 2021-04-30
Supplement: s1 [file s1]

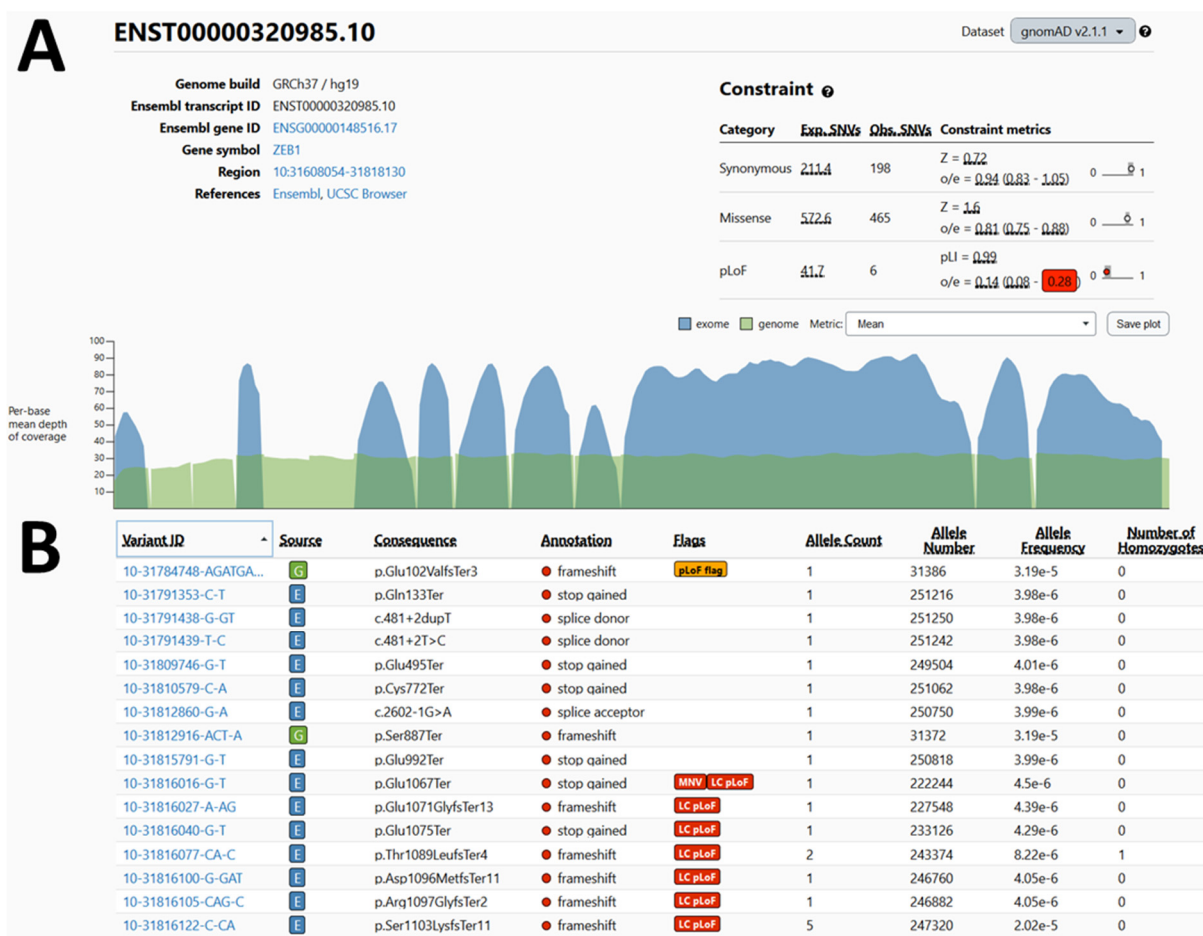

**Figure S1.** Screenshots of gnomADv.2.1.1 page documenting *ZEB1* variants. (A) pLI and o/e scores assessing intolerance to haploinsufficiency (B) Loss-of-function variants. Information shown is for the ENST00000320985.10 transcript that corresponds to NM\_030751.6 used as the reference sequence in studies reporting on variants causing PPCD3. Source: <https://gnomad.broadinstitute.org/>.
